# Supplementary material
Source: publisher site journal article supplement (https://www.dovepress.com/article/606548)
Supplement: Supplementary file 1 [file Supplementary%20Material%20.docx]

| **Table S1. Parameter Estimates for Multinomial Logistic Regression (Female subgroup，Reference: No/Slight Effect [Grade 1])** | | | | | | | | |
| --- | --- | --- | --- | --- | --- | --- | --- | --- |
| **Follow-up Grade** | **Predictor** | ***β*** | **Std. Error** | **Wald** | **df** | ***P-value*** | **Exp(β)** | **95% CI for Exp(β) (Lower, Upper)** |
| **Grade 2 (Moderate Effect)** | Intercept | 5.742 | 11.688 | 0.241 | 1 | 0.623 | – | – |
| Method (Apheresis vs Buffy coat) | 0.028 | 0.86 | 0.001 | 1 | 0.974 | 1.029 | (0.190, 5.556) |
| Height | -0.017 | 0.076 | 0.05 | 1 | 0.822 | 0.983 | (0.848, 1.140) |
| Weight | -0.007 | 0.049 | 0.021 | 1 | 0.883 | 0.993 | (0.901, 1.094) |
| Age | -0.077 | 0.041 | 3.504 | 1 | 0.061 | 0.926 | (0.855, 1.004) |
| Treatment Frequency | 0.029 | 0.378 | 0.006 | 1 | 0.94 | 1.029 | (0.490, 2.159) |
| PRP Platelet | 0 | 0.002 | 0.004 | 1 | 0.952 | 1 | (0.997, 1.003) |
| PRP WBC | -0.022 | 1.144 | 0 | 1 | 0.985 | 0.978 | (0.104, 9.214) |
| PRP RBC | 3.603 | 46.112 | 0.006 | 1 | 0.938 | 36.695 | (2.061×10⁻38,1.286×10⁻²⁷) |
| **Grade 3 (Significant Effect)** | Intercept | 15.451 | 10.193 | 2.298 | 1 | 0.13 | – | – |
| Method (Apheresis vs Buffy coat) | -0.227 | 0.696 | 0.107 | 1 | 0.744 | 0.797 | (0.204, 3.117) |
| Height | -0.09 | 0.067 | 1.798 | 1 | 0.18 | 0.914 | (0.801, 1.043) |
| Weight | -0.02 | 0.044 | 0.214 | 1 | 0.643 | 0.98 | (0.900, 1.067) |
| Age | -0.032 | 0.033 | 0.948 | 1 | 0.33 | 0.968 | (0.907, 1.033) |
| Treatment Frequency | 0.578 | 0.29 | 3.987 | 1 | 0.046 | 1.783 | (1.011, 3.145) |
| PRP Platelet | 0 | 0.001 | 0.062 | 1 | 0.803 | 1 | (0.998, 1.003) |
| PRP WBC | -0.246 | 1.006 | 0.06 | 1 | 0.807 | 0.782 | (0.109, 5.615) |
| PRP RBC | -30.061 | 40.741 | 0.544 | 1 | 0.461 | 8.800E−14 | (1.842×10⁻48, 4.596×10⁻42) |
| Note: PRP = platelet-rich plasma; WBC = white blood cell; RBC = red blood cell. Reference category for follow-up grade: No/Slight Effect (Grade 1); for method: Apheresis (1). | | | | | | | | |
|  |
|  |

| **Table S2. Parameter Estimates for Multinomial Logistic Regression (Male subgroup，Reference: No/Slight Effect [Grade 1])** | | | | | | | | |
| --- | --- | --- | --- | --- | --- | --- | --- | --- |
| **Follow-up Grade** | **Predictor** | ***β*** | **Std. Error** | **Wald** | **df** | ***P-value*** | **Exp(β)** | **95% CI for Exp(β) (Lower, Upper)** |
| **Grade 2 (Moderate Effect)** | Intercept | -4.337 | 10.524 | 0.17 | 1 | 0.68 | – | – |
| Method (Apheresis vs Buffy coat) | -2.736 | 1.128 | 5.884 | 1 | 0.015 | 0.065 | (0.007, 0.591) |
| Height | 0.012 | 0.058 | 0.041 | 1 | 0.839 | 1.012 | (0.903, 1.134) |
| Weight | -0.012 | 0.035 | 0.109 | 1 | 0.742 | 0.988 | (0.923, 1.059) |
| Age | -0.026 | 0.043 | 0.366 | 1 | 0.545 | 0.974 | (0.896, 1.060) |
| Treatment Frequency | 1.073 | 0.446 | 5.776 | 1 | 0.016 | 2.923 | (1.219, 7.010) |
| PRP Platelet | 0.002 | 0.002 | 0.798 | 1 | 0.372 | 1.002 | (0.998, 1.005) |
| PRP WBC | 0.344 | 1.197 | 0.083 | 1 | 0.774 | 1.411 | (0.135, 14.736) |
| PRP RBC | -66.162 | 61.034 | 1.175 | 1 | 0.278 | 1.845E−29 | (2.061×10⁻81, 1.652×10⁻77) |
| **Grade 3 (Significant Effect)** | Intercept | -5.423 | 9.476 | 0.328 | 1 | 0.567 | – | – |
| Method (Apheresis vs Buffy coat) | -2.9 | 1.049 | 7.644 | 1 | 0.006 | 0.055 | (0.007, 0.430) |
| Height | 0.03 | 0.053 | 0.326 | 1 | 0.568 | 1.031 | (0.929, 1.144) |
| Weight | -0.033 | 0.034 | 0.945 | 1 | 0.331 | 0.967 | (0.904, 1.035) |
| Age | -0.031 | 0.039 | 0.632 | 1 | 0.427 | 0.969 | (0.898, 1.047) |
| Treatment Frequency | 1.089 | 0.436 | 6.227 | 1 | 0.013 | 2.97 | (1.263, 6.985) |
| PRP Platelet | 0.001 | 0.001 | 1.055 | 1 | 0.304 | 1.001 | (0.999, 1.004) |
| PRP WBC | -0.804 | 1.156 | 0.485 | 1 | 0.486 | 0.447 | (0.046, 4.307) |
| PRP RBC | 7.385 | 47.828 | 0.024 | 1 | 0.877 | 1611.32 | (3.132×10⁻38, 8.829×10⁻33) |
| Note: PRP = platelet-rich plasma; WBC = white blood cell; RBC = red blood cell. Reference category for follow-up grade: No/Slight Effect (Grade 1); for method: Apheresis (1). | | | | | | | | |
|  |
|  |

| **Table S3. Likelihood ratio tests for effects in the multinomial logistic regression model (reference outcome: Grade 1)** | | | | | | | | |
| --- | --- | --- | --- | --- | --- | --- | --- | --- |
| **Effect** | **−2 Log Likelihood (Reduced Model)** | **Likelihood Ratio χ²** | **df** | **P value** |  |  |  |  |
| Method × Sex | 303.102 | 3.476 | 2 | 0.176 |  |  |  |  |
| Height | 300.03 | 0.404 | 2 | 0.817 |  |  |  |  |
| Weight | 300.941 | 1.315 | 2 | 0.518 |  |  |  |  |
| Age | 303.474 | 3.848 | 2 | 0.146 |  |  |  |  |
| Treatment frequency | 315.178 | 15.552 | 2 | <0.001 |  |  |  |  |
| PRP platelet | 300.167 | 0.541 | 2 | 0.763 |  |  |  |  |
| PRP WBC | 299.882 | 0.356 | 2 | 0.837 |  |  |  |  |
| PRP RBC | 299.821 | 0.195 | 2 | 0.907 |  |  |  |  |
